# Supplementary material for: Very bright and efficient ITO-free narrow-spectrum micro-cavity top-emitting organic light-emitting diodes with low operation voltage
Source: Royal Society of Chemistry journal article supplement (doi:10.1039/d1tc05697b), 2022-01-01
Supplement: d1tc05697b1.pdf [file d1tc05697b1.pdf]

## Supporting Information

Very bright and efficient ITO-free narrow-spectrum micro-cavity top-emitting organic light-emitting diodes with low operation voltage

Xiaokang Li <sup>a,b</sup>, Wenxing Liu <sup>b</sup>, Kai Chen <sup>b</sup>, Chunyu Yu <sup>b</sup>, Xiaoyang Xia <sup>b</sup>, Guojun Liu <sup>a,c,\*</sup>, and Liang Zhou <sup>b,\*</sup>

<sup>a</sup> *School of OPTO-Electronic Engineering, Changchun University of Science and Technology, Changchun 130022, P. R. China*

<sup>b</sup> *State Key Laboratory of Rare Earth Resource Utilization, Changchun Institute of Applied Chemistry, Chinese Academy of Sciences, Changchun 130022, P. R. China*

<sup>c</sup> *School of Physics and Electronic Engineering, Hainan Normal University, Haikou 571100, P. R. China*

---

<sup>a</sup> Correspondence to: School of OPTO-Electronic Engineering, Changchun University of Science and Technology, Changchun 130022, People's Republic of China. Tel.: +8643185583390. *E-mail address*: gjliu626@126.com.

<sup>b</sup> Correspondence to: State Key Laboratory of Rare Earth Resource Utilization, Changchun Institute of Applied Chemistry, Chinese Academy of Sciences, Changchun 130022, People's Republic of China. Tel.: +8643185262855. *E-mail address*: zhoul@ciac.ac.cn.

<sup>c</sup> Correspondence to: School of Physics and Electronic Engineering, Hainan Normal University, Haikou 571100, P. R. China.

**Table S1** The key properties of devices with EML at different thicknesses.

| Device | $V_{\text{turn-on}}$<br>(V) | $B^a$<br>( $\text{cd m}^{-2}$ ) | $\eta_c^b$ (EQE <sup>c</sup> )<br>( $\text{cd A}^{-1}$ ) | $\eta_p^d$<br>( $\text{lm W}^{-1}$ ) | $\eta_c^e$ ( $\text{cd A}^{-1}$ )<br>(EQE <sup>f</sup> )<br>( $1000 \text{ cd m}^{-2}$ ) | $\eta_c^g$ ( $\text{cd A}^{-1}$ )<br>(EQE <sup>h</sup> )<br>( $5000 \text{ cd m}^{-2}$ ) | $\text{CIE}_{x,y}^i$ |
|--------|-----------------------------|---------------------------------|----------------------------------------------------------|--------------------------------------|------------------------------------------------------------------------------------------|------------------------------------------------------------------------------------------|----------------------|
| 6 nm   | 2.2                         | 327609                          | 100.94<br>(30.5%)                                        | 110.61                               | 100.94<br>(30.5% 2.9 V)                                                                  | 95.74<br>(29.0% 3.4 V)                                                                   | (0.16, 0.69)         |
| 8 nm   | 2.2                         | 316355                          | 119.11<br>(32.1%)                                        | 129.91                               | 118.49<br>(31.9% 2.9 V)                                                                  | 117.26<br>(31.6% 3.3 V)                                                                  | (0.20, 0.71)         |
| 10 nm  | 2.2                         | 343809                          | 147.19<br>(35.6%)                                        | 163.32                               | 147.19<br>(35.6% 2.9 V)                                                                  | 142.04<br>(34.3% 3.5 V)                                                                  | (0.28, 0.68)         |
| 12 nm  | 2.2                         | 379485                          | 135.53<br>(34.3%)                                        | 143.66                               | 127.72<br>(32.3% 2.8 V)                                                                  | 134.83<br>(34.1% 3.3V)                                                                   | (0.23, 0.70)         |
| 14 nm  | 2.4                         | 422901                          | 161.35<br>(39.5%)                                        | 170.20                               | 160.43<br>(39.1% 3.3 V)                                                                  | 155.56<br>(37.9% 3.7 V)                                                                  | (0.27, 0.68)         |

<sup>a</sup> The data for maximum brightness (B), <sup>b</sup> maximum current efficiency ( $\eta_c$ ), <sup>c</sup> maximum external quantum efficiency (EQE), <sup>d</sup> maximum power efficiency ( $\eta_p$ ), <sup>e</sup> current efficiency ( $\eta_c$ ) at the practical brightness of  $1000 \text{ cd m}^{-2}$ , <sup>f</sup> external quantum efficiency (EQE) at the practical brightness of  $1000 \text{ cd m}^{-2}$ , <sup>g</sup> current efficiency ( $\eta_c$ ) at the practical brightness of  $5000 \text{ cd m}^{-2}$ , <sup>h</sup> EQE at the practical brightness of  $5000 \text{ cd m}^{-2}$ , <sup>i</sup> Commission Internationale de l'Eclairage coordinates ( $\text{CIE}_{x,y}$ ) at  $10 \text{ mA cm}^{-2}$ .

**Table S2** The key properties of devices A and B.

| Device | $V_{\text{turn-on}}$<br>(V) | $B^a$<br>( $\text{cd m}^{-2}$ ) | $\eta_c^b$ (EQE <sup>c</sup> )<br>( $\text{cd A}^{-1}$ ) | $\eta_p^d$<br>( $\text{lm W}^{-1}$ ) | $\eta_c^e$ ( $\text{cd A}^{-1}$ )<br>(EQE <sup>f</sup> )<br>( $1000 \text{ cd m}^{-2}$ ) | $\text{CIE}_{x,y}^g$ |
|--------|-----------------------------|---------------------------------|----------------------------------------------------------|--------------------------------------|------------------------------------------------------------------------------------------|----------------------|
| A      | 2.3                         | 288001                          | 94.34 (34.7%)                                            | 104.40                               | 94.33 (34.5%)                                                                            | (0.12, 0.62)         |
| B      | 2.3                         | 234423                          | 85.37 (27.6%)                                            | 103.00                               | 80.61 (26.0%)                                                                            | (0.20, 0.62)         |

<sup>a</sup> The data for maximum brightness (B), <sup>b</sup> maximum current efficiency ( $\eta_c$ ), <sup>c</sup> maximum external quantum efficiency (EQE), <sup>d</sup> maximum power efficiency ( $\eta_p$ ), <sup>e</sup> current efficiency ( $\eta_c$ ) at the practical brightness of  $1000 \text{ cd m}^{-2}$ , <sup>f</sup> external quantum efficiency (EQE) at the practical brightness of  $1000 \text{ cd m}^{-2}$ , <sup>g</sup> Commission Internationale de l'Eclairage coordinates ( $\text{CIE}_{x,y}$ ) at  $10 \text{ mA cm}^{-2}$ .

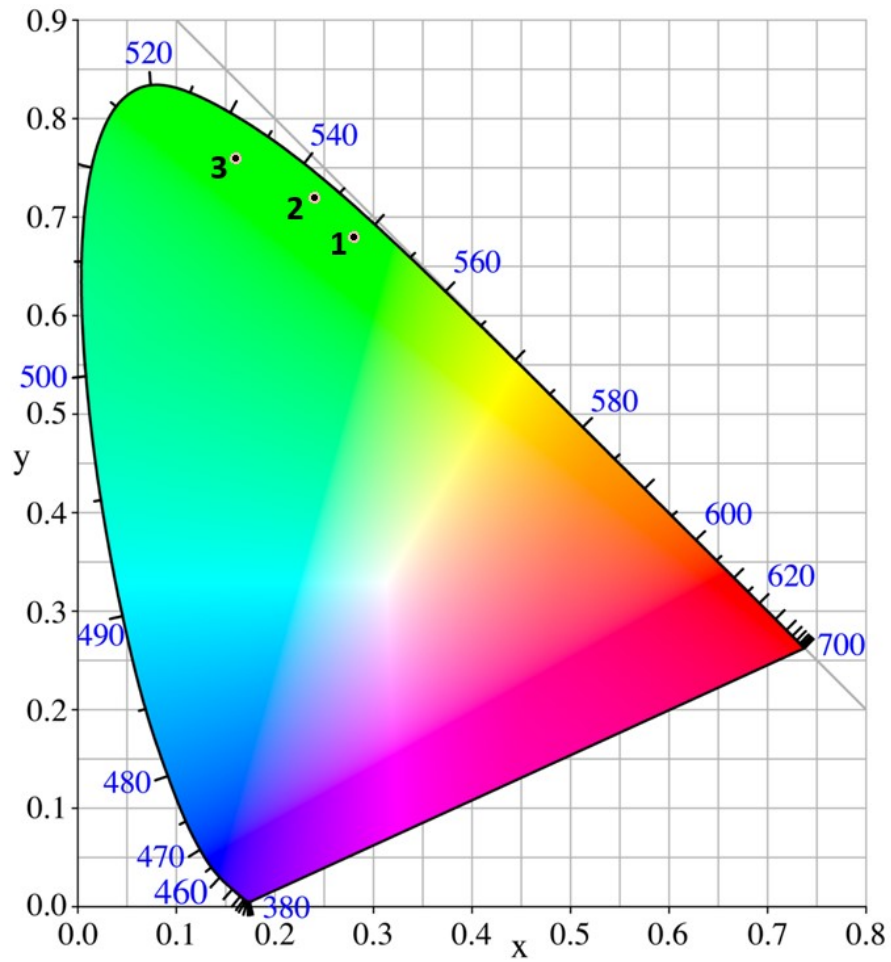

Figure S1 The change of CIE chromaticity diagram of devices with Ag electrode at different thicknesses.

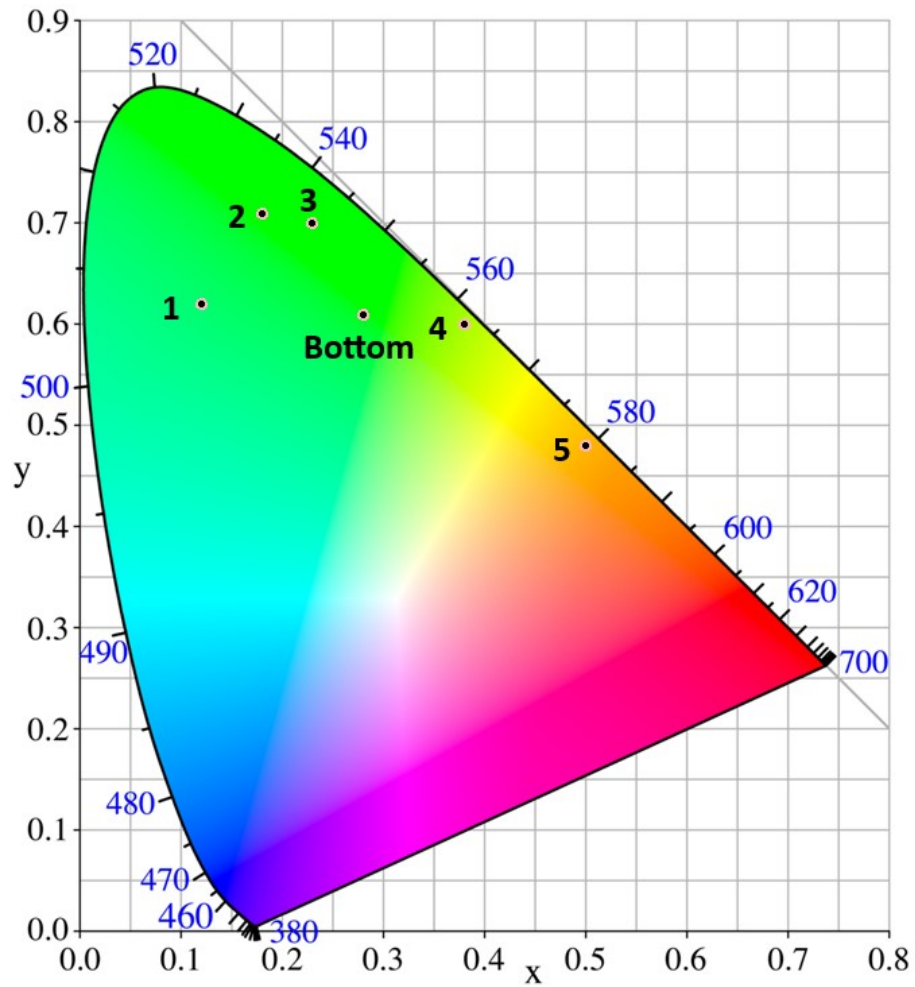

Figure S2 The change of CIE chromaticity diagram of devices with HTL at different thicknesses.

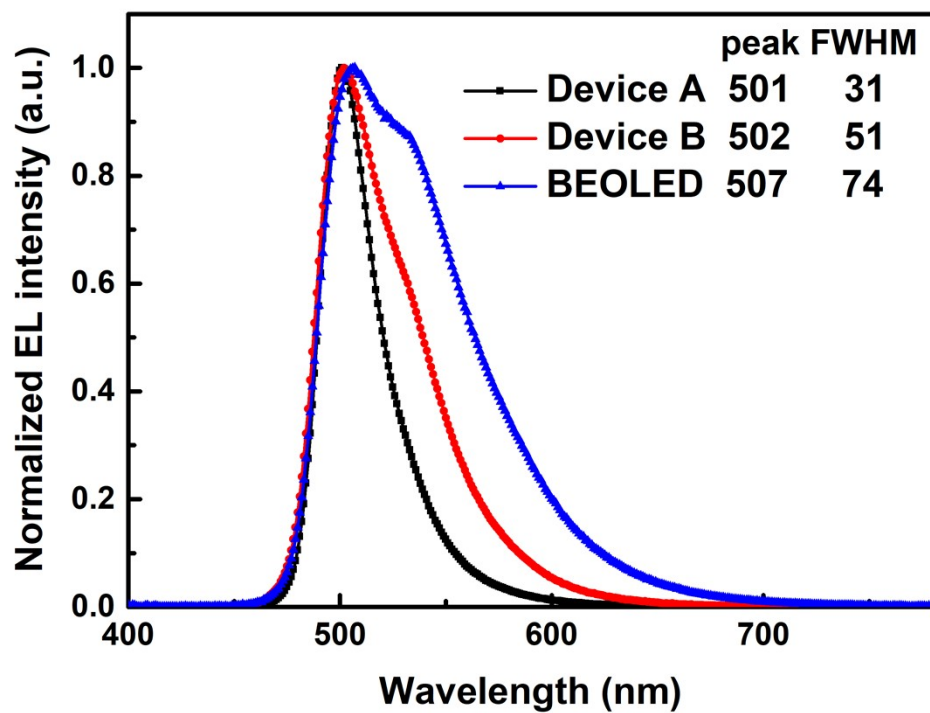

Figure S3 Normalized EL spectra of device A, device B and BEOLED.

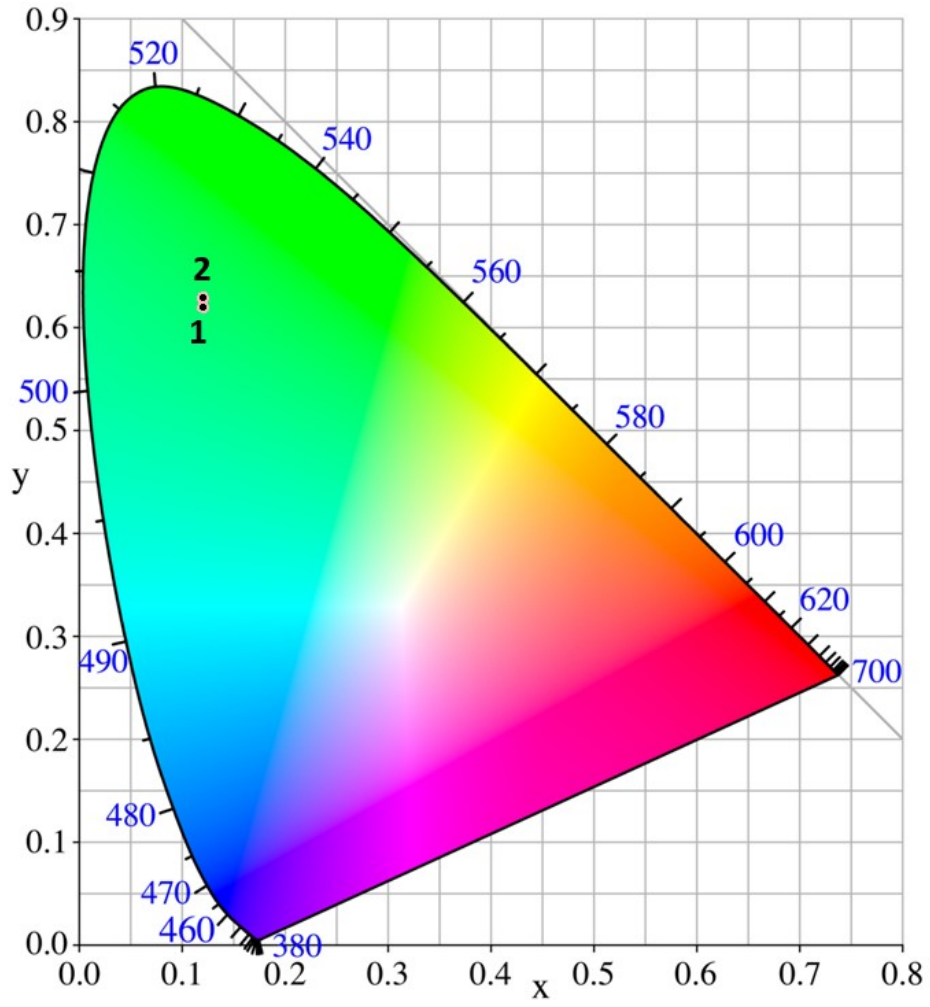

Figure S4 The change of CIE chromaticity diagram of devices A and C.
